# Supplementary material
Source: PubMed Central journal article supplement (PMC4285565)
Supplement: NIHMS631778-supplement-Supp_FigureS1.pdf [file NIHMS631778-supplement-Supp_FigureS1.pdf]

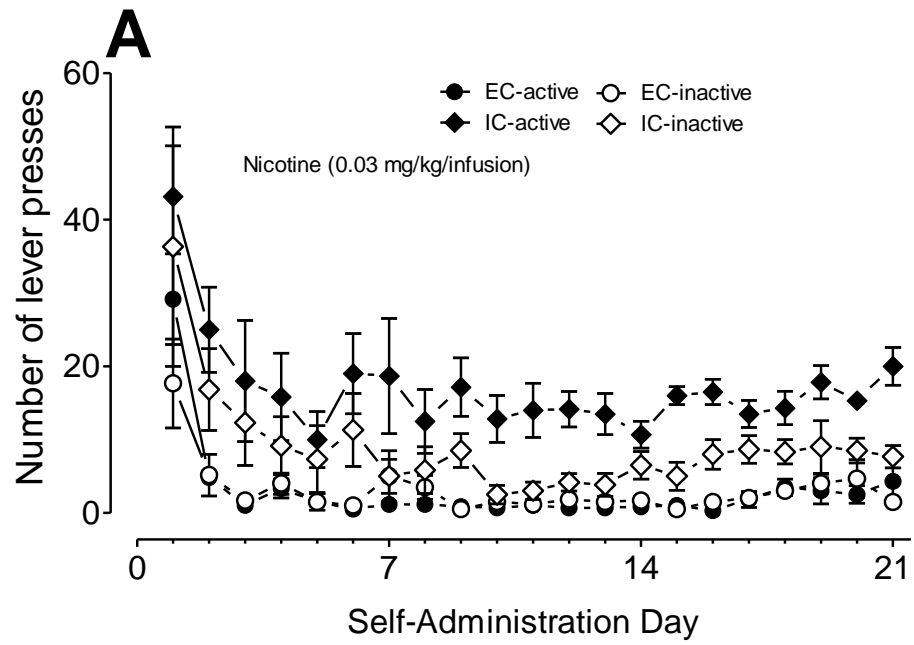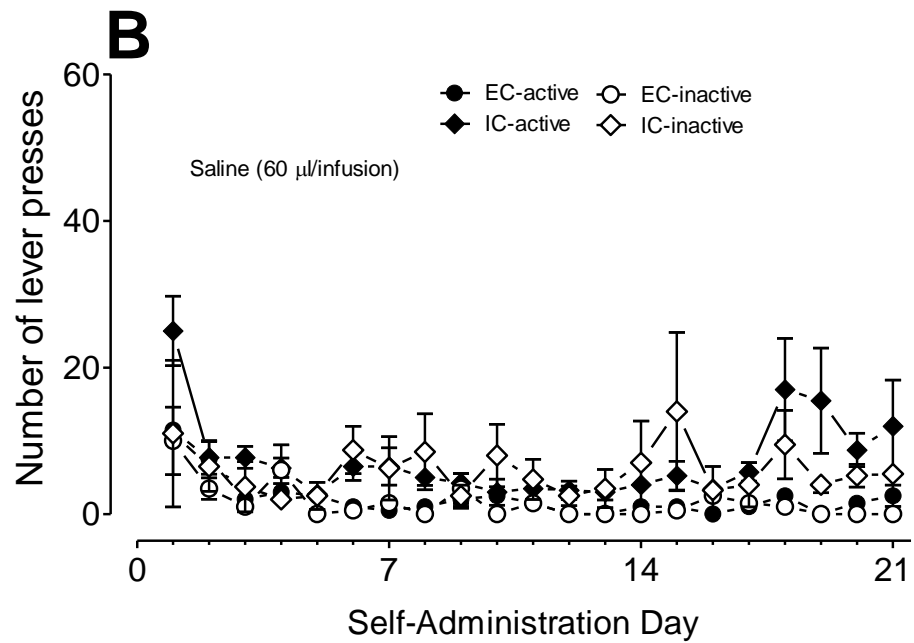

## Supplementary Figure 1

Nicotine-maintained responding in EC and IC rats. Following sucrose training, rats were allowed to self-administer nicotine (3 h/day) for 21 consecutive days. The number of active and inactive responses (mean  $\pm$  SEM) is plotted for the 21 days of self-administration with nicotine (A) or saline (B) for EC and IC rats. Nicotine (0.03 mg/kg/infusion) or saline was infused (60  $\mu$ l, 3.3 s) following a response on the active lever, while responding on the inactive lever resulted in no nicotine or saline infusion. Self-administration was conducted under a FR1 schedule of reinforcement. For the nicotine self-administration data (A), the housing  $\times$  day  $\times$  lever ANOVA (2  $\times$  21  $\times$  2) revealed a significant main effect of housing ( $F_{(1,10)} = 32.4, p < 0.001$ ), day ( $F_{(20,200)} = 11.4, p < 0.001$ ), lever ( $F_{(1,10)} = 8.32, p < 0.05$ ), and a housing  $\times$  lever interaction ( $F_{(1,10)} = 8.52, p < 0.05$ ). For the saline EC and IC controls (B), the housing  $\times$  day  $\times$  lever ANOVA (2  $\times$  21  $\times$  2) revealed significant main effects of housing ( $F_{(20,100)} = 2.9, p < 0.001$ ) and day ( $F_{(1,5)} = 18.7, p < 0.01$ ). There were no other significant main effects or interactions.
